# Supplementary material
Source: PubMed Central journal article supplement (PMC3180887)
Supplement: NIHMS325043-supplement-Supp_Fig_S1-S2.pdf [file NIHMS325043-supplement-Supp_Fig_S1-S2.pdf]

# **Involvement of Protein Acetylation in Glucose-induced Transcription of a Stress-Responsive Promoter**

Bruno P. Lima<sup>1</sup>, Haike Antelmann<sup>2</sup>, Katrin Gronau<sup>2</sup>, Bui Khanh Chi<sup>2</sup>, Dörte Becher<sup>2</sup>,  
Shaun R. Brinsmade<sup>3</sup> and Alan J. Wolfe<sup>1\*</sup>

<sup>1</sup>Department of Microbiology and Immunology  
Loyola University Chicago  
Stritch School of Medicine  
2160 S. First Ave. Bldg. 105  
Maywood, IL 60153

<sup>2</sup>Institute for Microbiology,  
Ernst-Moritz-Arndt-University of Greifswald,  
F.-L.-Jahn-Str. 15, D-17487 Greifswald, Germany

<sup>3</sup>Department of Bacteriology  
University of Wisconsin  
Madison, WI 53706

\*Corresponding author  
[awolfe@lumc.edu](mailto:awolfe@lumc.edu)  
Phone: (708) 216-5814  
Fax: (708) 216-9575

**(Supplemental Information)**

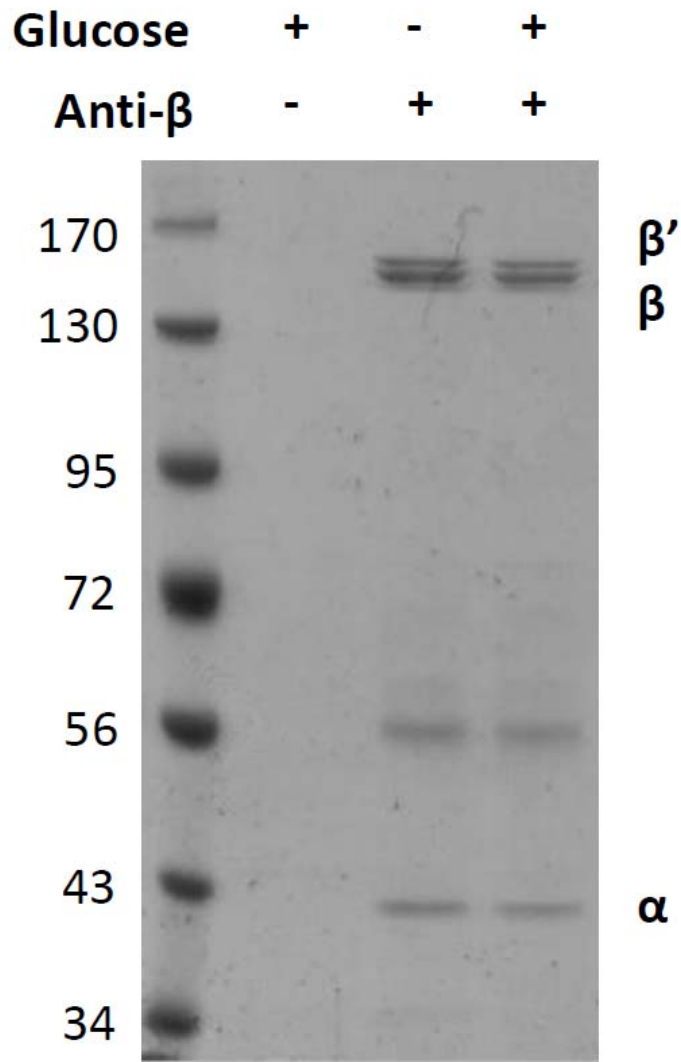

**Supplemental Figure 1:** A  $\lambda cpxP$  lysogen of the WT (PAD282) was grown at 37°C with shaking in buffered TB or the same medium supplemented with 0.4% glucose. Cells were pelleted by centrifugation after 7.5 hours incubation, the protein harvested, the samples subjected to immunoprecipitation with an anti- $\beta$  monoclonal antibody, and separated by SDS-PAGE as described in Materials and Methods. Immunoprecipitated proteins were stained by coomassie.

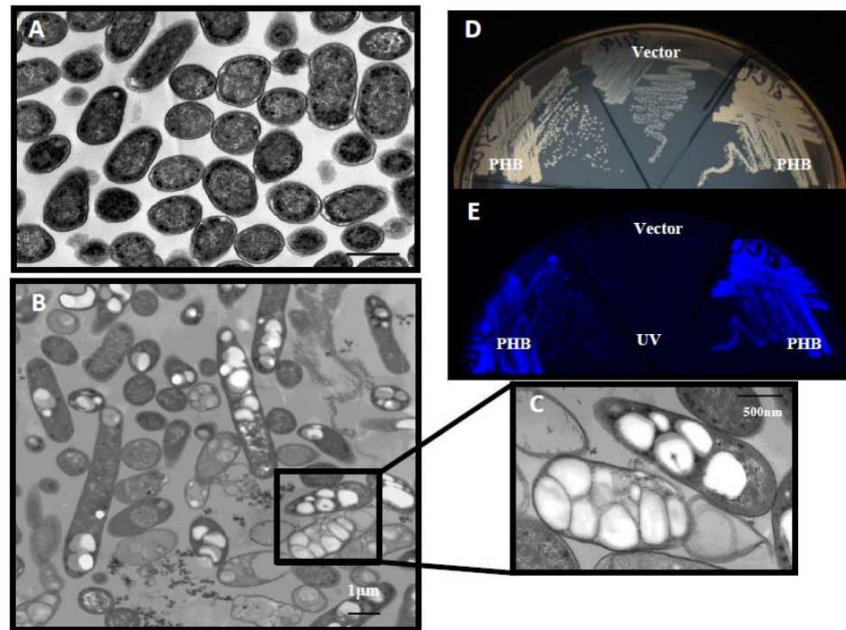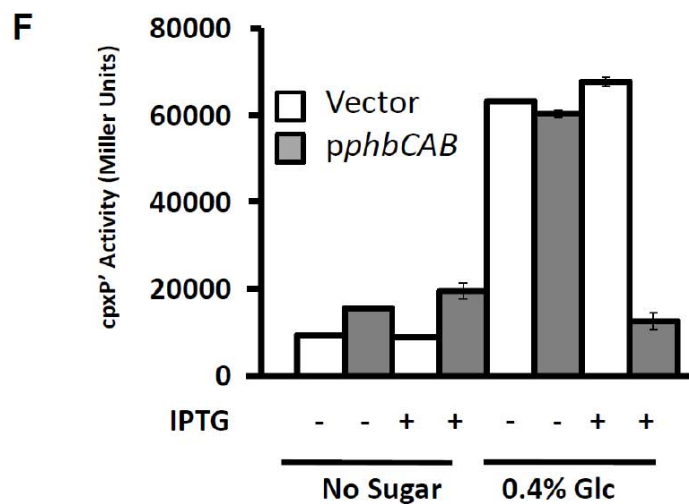

**Supplemental Figure 2:** When expressed, *phbCAB* promotes the synthesis of PHB granules that accumulate in the cytoplasm of cells (Steinbuchel & Schlegel, 1991, Nawrath *et al.*, 1994)\*. These granules can be observed by EM and also by UV light when stained with Nile Red (Ostle and Holt, 1982)\*. TEM of *E. coli* (PAD282) transformed with expression vector carrying *phbCAB* under the control of an IPTG inducible promoter in the absence (A), or presence of IPTG (B). Close-up of PHB particles within an *E. coli* cell (C). Nile Red plates with IPTG under natural light (D) or UV (E).  $\lambda$ *cpxP* lysogen of the WT (PAD282) grown at 37°C with shaking in buffered TB does not respond to the addition of 0.4% glucose when *phbCAB* overexpression is induced by IPTG (F). \*See manuscript for references.
